# Supplementary material for: DNA Mismatch Repair Proteins and BRAF V600E Detection by Immunohistochemistry in Colorectal Cancer Demonstrates Concordance with Next Generation Sequencing
Source: MDPI journal article supplement (doi:10.3390/jmp3040029), 2022-12-02
Supplement: s1 [file s1]

Archive with 1 entries (1 files):
- jmp-1979466-supplementary.pdf
