# Supplementary material for: DNA Mismatch Repair Proteins and BRAF V600E Detection by Immunohistochemistry in Colorectal Cancer Demonstrates Concordance with Next Generation Sequencing
Source: MDPI journal article supplement (doi:10.3390/jmp3040029), 2022-12-02
Supplement: s1 [file s1 › jmp-1979466-supplementary.pdf]

## **SUPPLEMENTARY MATERIAL**

**Supplementary Table S1.** Evaluation Criteria for Tissue for Study Enrollment.

|                                     | <b>Adequate</b>                                                                                             | <b>Not Adequate</b>                                                                                 |
|-------------------------------------|-------------------------------------------------------------------------------------------------------------|-----------------------------------------------------------------------------------------------------|
| Morphology<br>(H&E)                 | Cellular elements of interest are visualized, allowing clinical interpretation of the stain                 | Cellular elements of interest are not visualized, compromising clinical interpretation of the stain |
| Tumor Content                       | ≥ 50% of tissue with CRC                                                                                    | < 50% of tissue with CRC                                                                            |
| Pre-analytical Preparation<br>(H&E) | Formalin-fixed, paraffin-embedded with indications of proper fixation                                       | Formalin-fixed, paraffin-embedded with unacceptable morphology and indications of poor fixation     |
| Tissue Quantity<br>(FFPE Block)     | Sufficient tissue to support IHC (20 slides), sequencing (100 microns) and methylation testing (50 microns) | Insufficient tissue to fulfill study needs                                                          |

**Supplementary Table S2.** Key Genomic Loci Sequenced in ColoSeq™

| <b>Target</b> | <b>Reference Transcript</b> |
|---------------|-----------------------------|
| <i>MLH1</i>   | NM_000249.3                 |
| <i>MSH2</i>   | NM_000251.1                 |
| <i>MSH6</i>   | NM_000179.2                 |
| <i>PMS2</i>   | NM_000535.5                 |
| <i>BRAF</i>   | NM_004333.4                 |
| <i>POLE</i>   | NM_006231.2                 |
| <i>POLD1</i>  | NM_002691.3                 |

**Supplementary Table S3.** Molecular Status & IHC Assay Congruency

|                                                                                 | <b>Molecular Status</b>               | <b>IHC Status</b>                          |
|---------------------------------------------------------------------------------|---------------------------------------|--------------------------------------------|
| <b>Abnormal<br/>(presence of<br/>pathogenic<br/>mutation)</b>                   | <i>MLH1</i> Pathogenic Mutation       | MLH1 loss with PMS2 loss                   |
|                                                                                 | <i>MLH1</i> Promoter Hypermethylation | MLH1 loss with PMS2 loss                   |
|                                                                                 | <i>PMS2</i> Pathogenic Mutation       | PMS2 loss only                             |
|                                                                                 | <i>MSH2</i> Pathogenic Mutation       | MSH2 loss only<br>MSH2 loss with MSH6 loss |
|                                                                                 | <i>MSH6</i> Pathogenic Mutation       | MSH6 loss only                             |
|                                                                                 | <i>BRAF</i> p.V600E mutation          | BRAF V600E positive                        |
| <b>Normal/Expected<br/>(Absence of<br/>pathologic<br/>mutation)<sup>i</sup></b> | <i>MLH1</i> negative hypermethylation | MLH1 intact                                |
|                                                                                 | <i>PMS2</i>                           | PMS2 intact<br>PMS2 loss with MLH1 loss    |
|                                                                                 | <i>MSH2</i>                           | MSH2 intact                                |
|                                                                                 | <i>MSH6</i>                           | MSH6 intact<br>MSH6 loss with MSH2 loss    |
|                                                                                 | <i>BRAF</i>                           | BRAF V600E negative                        |

i- Due to the heterodimerization of MLH1/PMS2 and MSH2/MSH6, loss of partner staining can be observed in the absence of a mutation in that specific gene.

**Supplementary Table S4.** Agreement between IHC using VENTANA anti-BRAF V600E (VE1) antibody and NGS Testing

| <b>BRAF V600E<br/>Status (NGS/IHC)</b> | <b>Agreement</b> |            |          |               |
|----------------------------------------|------------------|------------|----------|---------------|
|                                        | <b>Type</b>      | <b>n/N</b> | <b>%</b> | <b>95% CI</b> |
| Positive/Abnormal                      | PPA              | 23/23      | 100.0    | (85.7, 100.0) |
| Negative/Normal                        | NPA              | 95/95      | 100.0    | (96.1, 100.0) |
| Total                                  | OPA              | 118/118    | 100.0    | (96.8, 100.0) |

Status for *BRAF* p.V600E was defined as Positive or Negative IHC results and Abnormal (presence of the p.V600E mutation) or Normal (wild-type *BRAF*) results by molecular testing.

**Supplementary Table S5.** IHC vs. Molecular Testing Status for Enrichment & Sequential Cohort

| Cohort     | IHC Test       | Molecular Tests[i] |                                   |       | Agreement |         |                      |
|------------|----------------|--------------------|-----------------------------------|-------|-----------|---------|----------------------|
|            |                | Normal [ii]        | Abnormal/<br>Hypermethylated[iii] | Total | Type      | n/N     | % (95% CI)           |
| Enrichment | Correct [iv]   | 49                 | 12                                | 61    | PPA       | 49/52   | 94.2<br>(87.5,100.0) |
|            | Incorrect [iv] | 3                  | 1                                 | 4     | NPA       | 12/13   | 92.3<br>(75.0,100.0) |
|            | Total          | 52                 | 13                                | 65    | OPA       | 61/65   | 93.8<br>(87.7,98.5)  |
| Sequential | Correct [iv]   | 474                | 46                                | 520   | PPA       | 474/474 | 100.0 (n.e.)         |
|            | Incorrect [iv] | 0                  | 3                                 | 3     | NPA       | 46/49   | 93.9<br>(86.7,100.0) |
|            | Total          | 474                | 49                                | 523   | OPA       | 520/523 | 99.4<br>(98.7,100.0) |

[i] For MLH1, molecular testing included both sequencing data and *MLH1* promoter hypermethylation results. For PMS2, abnormal included sequencing data for *PMS2* and *MLH1* and *MLH1* hypermethylation as PMS2 stability is linked to MLH1 status; For MSH2, molecular testing was solely based on the sequencing test; for MSH6, molecular testing included sequencing test results for *MSH6* and *MSH2* as MSH2 stability is linked to MSH6 status. For BRAF V600E, molecular testing was solely based on the sequencing test.

[ii] Normal = Molecular results support intact protein expression.

[iii] Abnormal/Hypermethylated = A sequencing result consistent with loss of protein expression or positive for promoter hypermethylation.

[iv] A "Correct" or "Incorrect" IHC assessment was determined by viewing the congruency between molecular and IHC testing.

**Supplementary Table S6.** Pooled Analysis for VENTANA MMR IHC Panel Agreement between IHC and Molecular Testing

| Status*<br>(Molecular/IHC) | Agreement |         |      |              |
|----------------------------|-----------|---------|------|--------------|
|                            | Type      | n/N     | %    | 95% CI       |
| Normal/Intact              | PPA       | 523/526 | 99.4 | (98.7,100.0) |
| Abnormal/Loss              | NPA       | 58/62   | 93.5 | (87.1, 98.6) |
| Total                      | OPA       | 581/588 | 98.8 | (97.8, 99.7) |

\*For IHC, MMR Status is Intact or Loss for protein expression. For this analysis, BRAF V600E negative and positive cases were included in Intact or Loss categories, respectively. Molecular testing indicates absence (Normal) or presence (Abnormal) of potential pathogenic mutations or *MLH1* promoter hypermethylation.

**Supplementary Table S7.** Pooled Analysis for four MMR IHC markers (without VENTANA anti-BRAF V600E (VE1) antibody) Agreement between IHC and Molecular Testing

| Status*<br>(Molecular/IHC) | Agreement |         |      |               |
|----------------------------|-----------|---------|------|---------------|
|                            | Type      | n/N     | %    | 95% CI        |
| Normal/Intact              | PPA       | 428/431 | 99.3 | (98.4, 100.0) |
| Abnormal/Loss              | NPA       | 35/39   | 89.7 | (79.4, 97.7)  |
| Total                      | OPA       | 463/470 | 98.5 | (97.3, 99.6)  |

\*For IHC, Status is Intact or Loss for protein expression. Molecular testing indicates absence (Normal) or presence (Abnormal) of potential pathogenic mutations or *MLH1* promoter hypermethylation.

**Supplementary Table S8.** Description of Discrepant Cases

| Case ID    | Discrepant Marker | Sequencing Status       | IHC Status                                                      | MSI Status | Comments                                                                                                                                                                                                                                                                                                  |
|------------|-------------------|-------------------------|-----------------------------------------------------------------|------------|-----------------------------------------------------------------------------------------------------------------------------------------------------------------------------------------------------------------------------------------------------------------------------------------------------------|
| pUID00021  | MSH6              | <i>MSH6</i><br>Abnormal | MLH1 intact<br>PMS2 intact<br>MSH2 intact<br><b>MSH6 intact</b> | MSS        | <i>POLE</i> - p.P286R mutation, <i>MSH6</i> – multiple variants, one variant of unknown significance is non-synonymous, which may not result in loss of staining by IHC, negative for MLH1 promoter methylation (UW-GSTL)                                                                                 |
| pUID00023  | MSH6              | <i>MSH6</i><br>Abnormal | MLH1 loss<br>PMS2 loss<br>MSH2 intact<br><b>MSH6 intact</b>     | MSI-H      | <i>MSH6</i> -p.R1095H @37%,<br>p.F1088Lfs*5 @16%. One variant is SNV, <i>MSH6</i> could be expressed and detected by IHC<br><i>MLH1</i> -p.K196Nfs*6 @36% - likely heterozygous in tumor<br><i>PMS2</i> – p.E109Gfs*30 @28% - likely heterozygous in tumor, positive for <i>MLH1</i> promoter methylation |
| pUID00024  | MSH6              | <i>MSH6</i><br>Abnormal | MLH1 intact<br>PMS2 intact<br>MSH2 intact<br><b>MSH6 intact</b> | MSI-H      | <i>MSH6</i> - p.Q177* @26%,<br>p.F1088Lfs*5 @14%,<br>IHC – heterogeneous staining                                                                                                                                                                                                                         |
| pUID00042  | PMS2              | Normal                  | MLH1 intact<br><b>PMS2 loss</b><br>MSH2 intact<br>MSH6 intact   | MSI-H      | Poor DNA quality, low coverage 55x, <i>MSH6</i> - p.F1088Sfs*2 @13%, low VAF frameshift - likely secondary to MSI, negative for <i>MLH1</i> promoter methylation (UW-GSTL)                                                                                                                                |
| pUID00080  | MSH2              | Normal                  | MLH1 intact<br>PMS2 intact<br><b>MSH2 loss</b><br>MSH6 loss     | MSI-H      | <i>MSH2</i> - p.T320Yfs*13 @29%, heterozygous frameshift, <i>PMS2</i> – p.R628* @31% – probably not resulting in loss of PMS2, <i>MSH6</i> – p.S126P @34%, p.F1088Lfs*5 @15%                                                                                                                              |
| pUID00087  | MSH2              | Normal                  | MLH1 intact<br>PMS2 intact<br><b>MSH2 loss</b><br>MSH6 loss     | MSI-H      | <i>MSH2</i> - p. T320Yfs*13 @27% - probably secondary to MSI<br><i>MSH6</i> - p.S126P @31%,<br>p.F1088Lfs*5 @17%                                                                                                                                                                                          |
| pUID000124 | MSH6              | <i>MSH6</i><br>Abnormal | MLH1 loss<br>PMS2 loss<br>MSH2 intact<br><b>MSH6 intact</b>     | MSI-H      | Possible Lynch syndrome – <i>MSH6</i> - p.K13T, p.F1191Lfs*4<br>no BRAF mutation, <i>MLH1</i> promoter methylation - positive on residual DNA (UW-GSTL)                                                                                                                                                   |

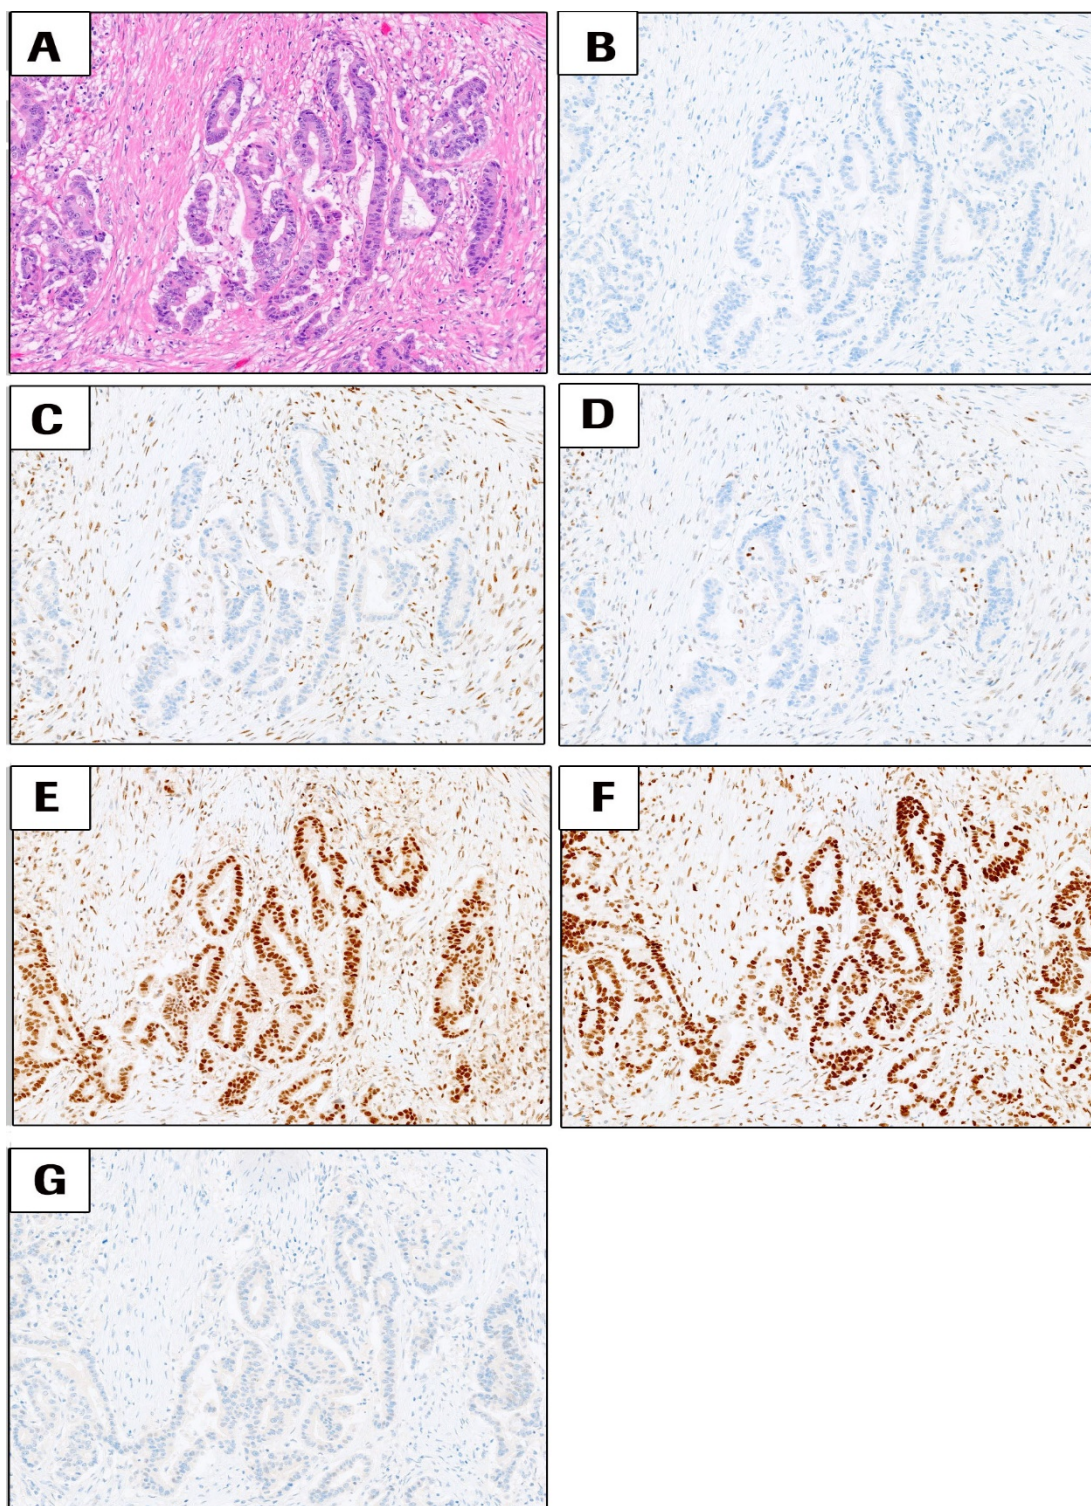

**Supplementary Figure S1.** Representative images of possible Lynch syndrome CRC case with deficient DNA mismatch repair status (dMMR) due to MLH1 and PMS2 loss, with intact MSH2 and MSH6, BRAF V600E is negative for this case. All images are 10x magnification. (A) H&E, (B) negative control antibody, (C) MLH1, (D) PMS2, (E) MSH2, (F) MSH6 and (G) BRAF V600E staining. All images are at 10x magnification.

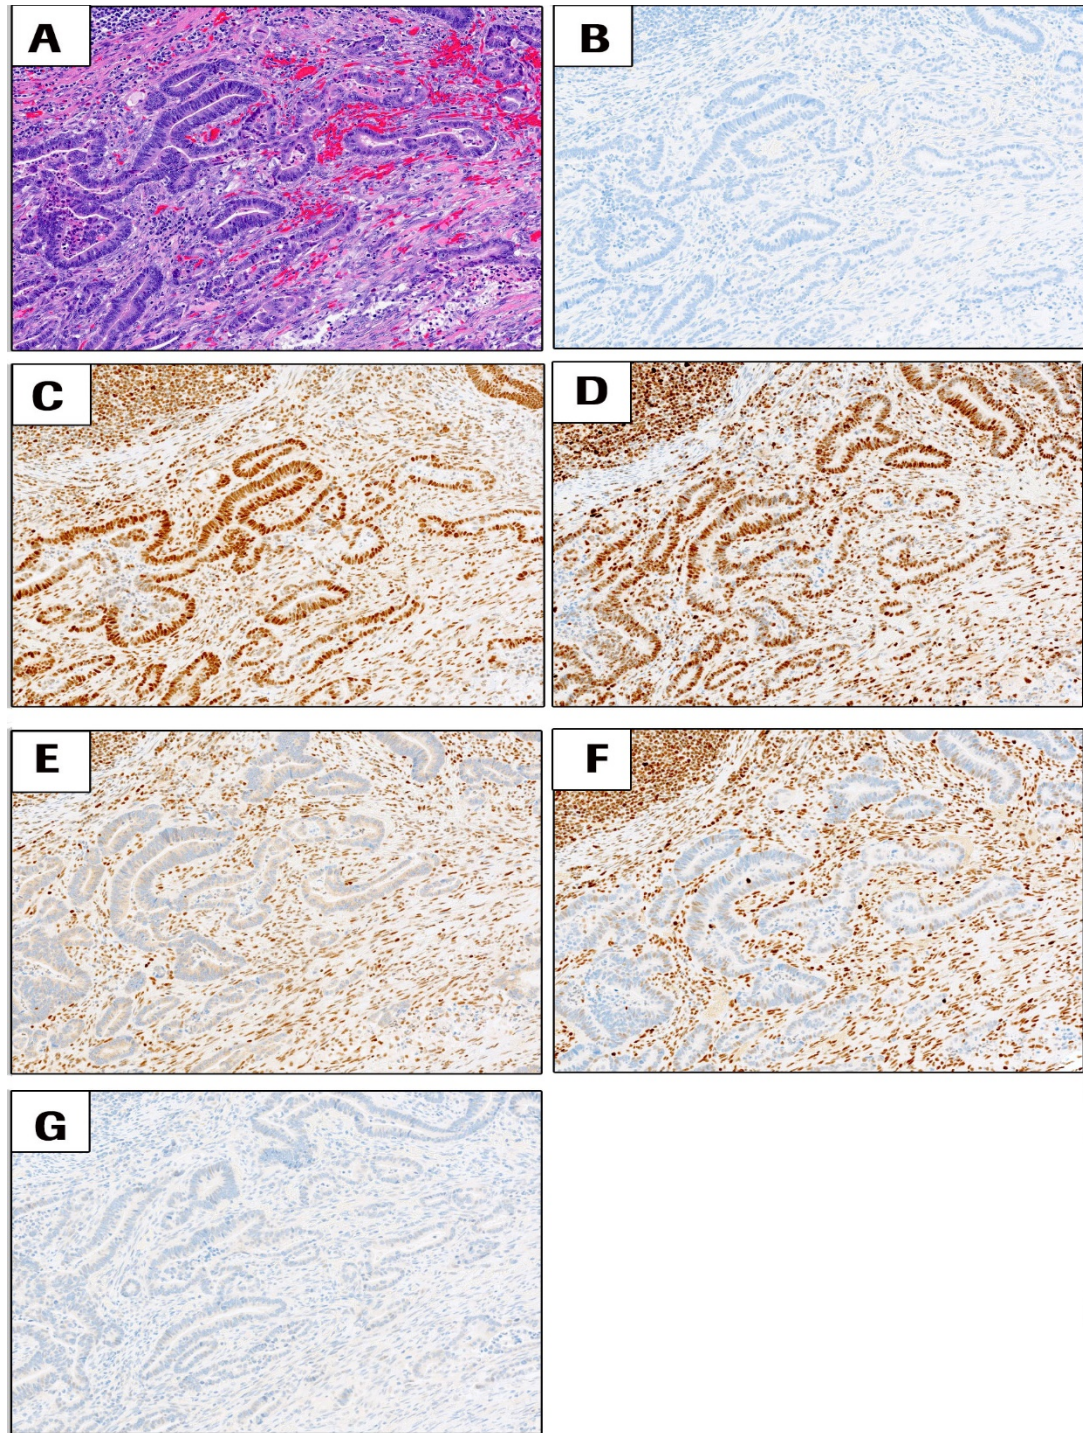

**Supplementary Figure S2. Possible Lynch Syndrome.** This case exhibits deficient DNA mismatch repair status (dMMR) due to MSH2 and MSH6 loss, with intact MLH1 and PMS2. BRAF V600E is negative for this case. All images are 10x magnification. (A) H&E, (B) negative control antibody, (C) MLH1, (D) PMS2, (E) MSH2, (F) MSH6 and (G) BRAF V600E staining. All images are at 10x magnification.
